# Supplementary material for: Structure and permeation of organic–inorganic hybrid membranes composed of poly(vinyl alcohol) and polysilisesquioxane
Source: Royal Society of Chemistry journal article supplement (doi:10.1039/b806303f), 2008-01-01
Supplement: b806303f.pdf [file b806303f.pdf]

# Supplementary information

## Structure and permeation of organic-inorganic hybrid membranes composed of poly(vinyl alcohol) and polysilisesquioxane

Qiu Gen Zhang, Qing Lin Liu\*, Feng Feng Shi, Ying Xiong

*Department of Chemical and Biochemical Engineering, College of Chemistry and Chemical Engineering*

*Xiamen University, Xiamen 361005, China E-mail: ql Liu@xmu.edu.cn*

### Part A: Preparation of the samples for XRD, SEM and TEM

XRD: The membrane with thickness of  $20 \pm 1 \mu\text{m}$  was fixed on a sample holder with a double-side adhesive tape, as shown in the following figure. The sample holder with a  $15 \times 15 \text{ mm}^2$  hole is made of aluminum plate with thickness of 1.5 mm. XRD was performed by X-ray powder diffraction (XRD, Panalytical X'pert, Enraf - Nonious Co. Holland) at  $25^\circ \text{C}$ . A Cu  $K\alpha$  radiation was used with a step size of  $0.0167^\circ$  and a scan speed of  $0.167^\circ \cdot \text{s}^{-1}$  in the range from  $5$  to  $45^\circ$ .

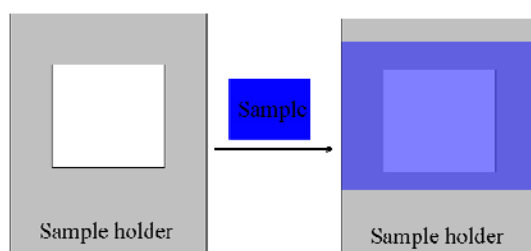

Schematic diagram of preparation of XRD samples

SEM: A small piece of membrane was fixed on sample stage which is matching to XL30ESEM with a black conductive adhesive. Then, gold was sputtered on the membrane surface since the PVA and hybrid membranes are not conductible. The samples for SEM were then prepared.

TEM: The casting solution of the HM-5 was prepared. Copper net (300 mesh) whose surface was coated with carbon was immersed into the casting solution. A liquid film was formed on the copper net and was then dried to form a solid film. The copper net with the sample was placed into F30 to observe the structure of the HM-5.

Part B: Figures

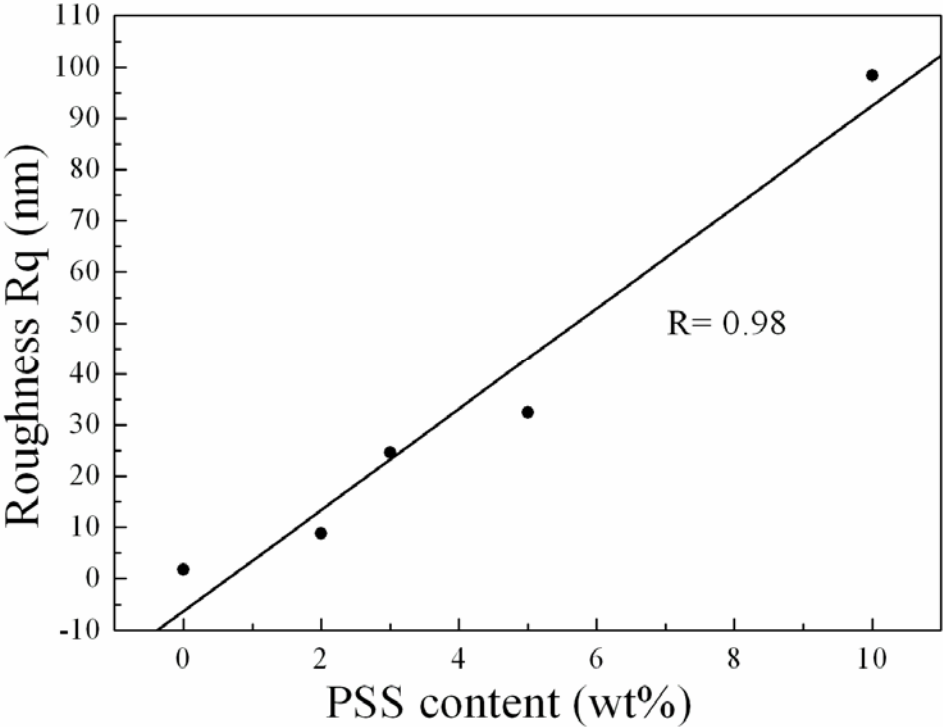

Fig.S1 Relation of the surface roughness of the hybrid membranes with the PSS content

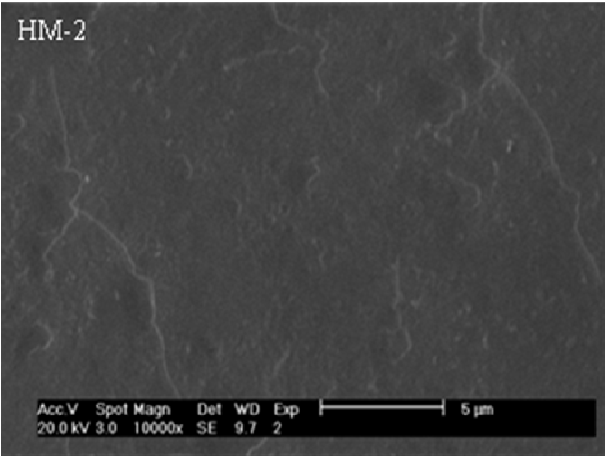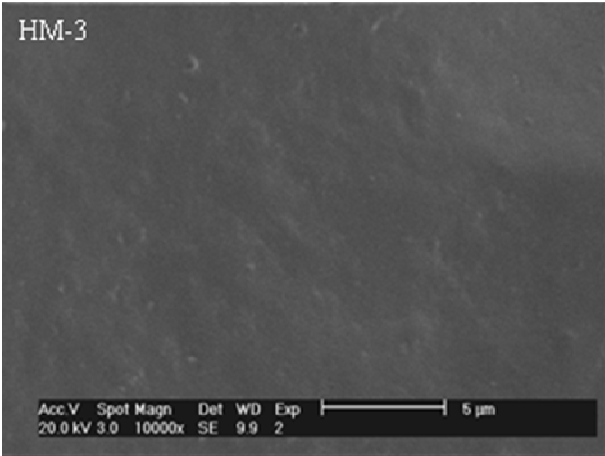

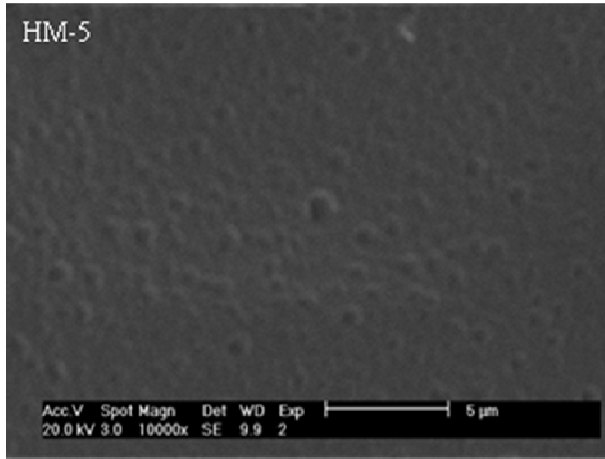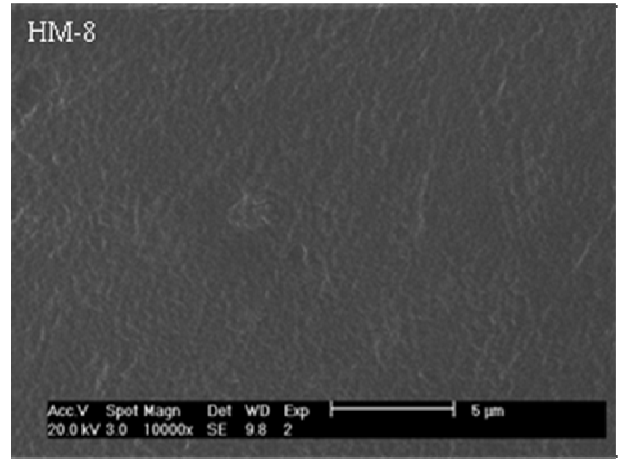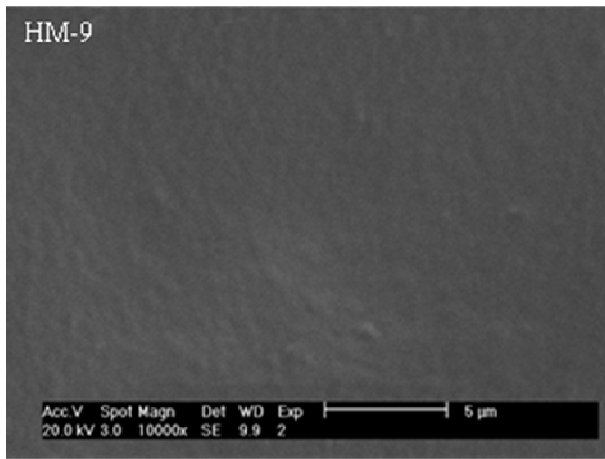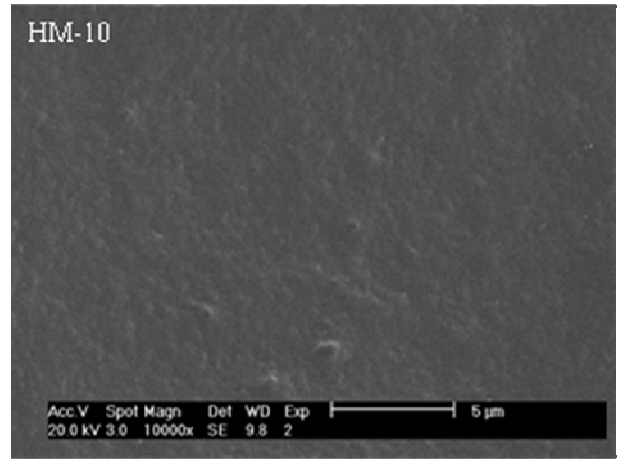

**Fig.S2** SEM micrographs of the surface of the hybrid membranes with different PSS loading
